# Supplementary material
Source: HighWire-hosted journal article supplement (http://thorax.bmjjournals.com/highwire/filestream/174276/field_highwire_adjunct_files/0/58121036CAMPlist.pdf)
Supplement: 58121036CAMPlist.pdf [file 58121036CAMPlist.pdf]

## **Members of CAMP Research Group**

The members of the CAMP Research Group as of November 1999 were:

### **Clinical centers**

**ASTHMA Inc, Seattle, WA:** Gail G. Shapiro, MD (Director); Thomas R. DuHamel, PhD (Co-Director); Mary V. Lasley, MD (Co-Director); Tamara Chinn, RN (Coordinator). Heather Eliassen, BA; Dan Crawford, RN; Babi Hammond; Clifton T. Furukawa, MD; Leonard C. Altman, MD; Frank S. Virant, MD; Paul V. Williams, MD; Dominick A. Minotti, MD; Michael S. Kennedy, MD; Jonathan W. Becker, MD; Chris Reagan; Grace White. C. Warren Bierman, MD (1992–1997); Marian Sharpe, RN (1992–1994); Timothy G. Wighton, PhD (1994–1998). (as of September, 2001):

**Brigham & Women's Hospital, Boston, MA:** Scott Weiss, MD, MS (Director); Anne Fuhlbrigge, MD (Principal Investigator); Walter Torda, MD (Co-Investigator); Anne Plunkett, RN, BSN, NP, (Coordinator); Martha Tata, RN; Nancy Madden, RN, BSN; Peter Barrant, MD; Kay Seligsohn, PhD; Linda Benson; Patricia Martin; Christine Darcy; Jean McAuliffe (1994–1995); Jay Koslof, PhD (1993–1995); Paula Parks (1993–1995); Carolyn Wells, RN (1993–1995); Ann Whitman, RN (1994–1996); Mary Grace, RN (1994–1996); Phoebe Fulton, (1997–1997); Deborah Susan Kelleher (1993–1997); Jennifer Gilbert (1997–1998); Agnes Martinez (1994–1997); Stephanie Haynes (1993–1998); Dana Mandel (1996–1998); Margaret Higham, MD (1996–1998); Paola Pacella (1993–1998); Johanna Sagarin (1998–1999); Melissa Van Horn, PhD (1996–1999); June Traylor, MSN, RN, (1996–1998); Sally Babigian, RN (1997–1999); Jose Caicedo (1998–1999); Julie Erickson (1998–1999); Deborah Jakubowski (1999); Anthony DeFilippo (1994–2000); Dirk Greineder, MD (1993–2000); Tatum Calder (1998–2001); Cindy Dorsainvil (1998–2001); Meghan Syring (1998–2001).

**The Hospital for Sick Children, Toronto, Ontario, Canada:** Ian MacLusky, MD, FRCP(C) (Director); Joe Reisman, MD, FRCP(C), MBA (Director, 1996–1999); Henry Levison, MD, FRCP(C) (Director, 1992–1996); Anita Hall, RN (Coordinator). Yola Benedet; Susan Carpenter, RN; Jennifer Chay; Kenneth Gore, MA; Sharon Klassen, MA; Melody Miki, RN, BScN; Renée Sananes, PhD; Christine Wasson, PhD. Michelle Collinson, RN (1994–1998); Jane Finlayson-Kulchin, RN (1994–1998); Noreen Holmes, RRT (1998–1999); Joséé Quenneville, MSc (1993–1995).

**Johns Hopkins Asthma & Allergy Center, Baltimore, MD:** N. Franklin Adkinson, Jr, MD (Director); Peyton Eggleston, MD (Co-Director); Elizabeth H. Aylward, PhD; Karen Huss, DNSc (Co-Investigator); Leslie Plotnick, MD (Co-Investigator); Margaret Pulsifer, PhD (Co-Investigator); Cynthia Rand, PhD (Co-Investigator); Barbara Wheeler, RN, BSN (Coordinator). Nancy Bollers, RN; Kimberly Hyatt; Mildred Pessaro; Stephanie Philips, RN.

**National Jewish Medical and Research Center, Denver, CO:** Stanley Szeffler, MD (Director); Harold S. Nelson, MD (Co-Director); Joseph Spahn, MD (Co-Investigator); D Sundström (Coordinator). Bruce Bender, PhD; Ronina Covar, MD; Andrew Liu, MD; Michael P. White. Kristin Brelsford (1997–1999); Jessyca Bridges (1995–1997); Jody Ciacco (1993–1996); Michael Eltz (1994–1995); Jeryl Feeley, MA (Coordinator, 1992–1995); Michael Flynn (1995–1996); Melanie Gleason, PA-C (1992–1999); Tara Junk-Blanchard (1997–2000); Joseph Hassell (1992–1998); Marcia Hefner (1992–1994); Caroline Hendrickson, RN (1995–1998; Coordinator, 1995–1997); Daniel Hettleman, MA (1995–1996); Charles G. Irvin, PhD (1992–1998); Jeffrey Jacobs, MD (1996–1997); Alan Kamada, PharmD (1994–1997); Sai Nimmagadda, MD (1993–1996); Kendra Sandoval (1995–1997); Jessica Sheridan (1994–1995); Trella Washington (1993–1997); Eric Willcutt, MA (1996–1997).

**University of California, San Diego and Kaiser Permanente Southern California Region, San Diego, CA:** Robert Zeiger, MD, PhD (Director); Anthony Horner, MD (Co-Investigator); Noah Friedman, MD (Co-Investigator); Al Jalowayski, PhD (Co-Investigator); Alan Lincoln, PhD (Co-Investigator); Michael H. Mellon, MD (Co-Investigator); Michael Schatz, MD (Co-Investigator); Kathleen Harden, RN (Coordinator). Linda L. Galbreath; Ellen Hanson; Elaine M. Jenson; Shirley King, MSW; Brian Lopez; Michaela Magiari, MA; Catherine A. Nelle, RN; Senia Pizzo, PhD; Eva Rodriguez. James G. Easton, MD (Co-Director, 1993–1994); Kathleen Mostafa, RN (1994–1995); Avraham Moscona (1994–1996); Karen Sandoval (1995–1996); Nevin W. Wilson, MD (Co-Director, 1991–1993).

**University of New Mexico, Albuquerque, NM:** H. William Kelly, PharmD (Director); Robert Annett, PhD (Co-Investigator); Naim Bashir, MD (Co-Investigator); Michael Clayton, MD (Co-Investigator); Angel Colon-Semidey, MD (Co-Investigator); Mary Spicher, RN (Coordinator). Marisa Braun; Shannon Bush; David Hunt, RRT; Elisha Montoya; Margaret Moreshead; Barbara Ortega, RRT; Hengameh H. Raissey. Roni Grad, MD (Co-Investigator, 1993–1995); Bennie McWilliams, MD (Co-Investigator, Director, 1992–1998); Shirley Murphy, MD (Co-Investigator, 1992–1994); Sandra McClelland, RN (Coordinator, 1993–1995); Teresa Archibeque (1994–1999); H. Selda Bereket (1995–1998); Sara Devault (1993–1997); Jeanne Larsson, RN (1995–1996); David Weers (1997–1998); Jose Zayas (1995–1996).

**Washington University, St. Louis, MO:** Robert C. Strunk, MD (Director); Leonard Bacharier, MD (Co-Investigator); Gordon R. Bloomberg, MD (Co-Investigator); James M. Corry, MD (Co-Investigator); Ellen Albers, RN, CNS-P, MSN (Coordinator). W. Patrick Buchanan; Gregg Belle, MA; Marisa Dolinsky, MA; Edwin B. Fisher, PhD; Stephen J. Gaioni, PhD; Emily Glynn, RN, MSN, CSPNP; Bernadette D. Heckman, MA; Cathy Hermann; Debra Kemp, RN, BSN; Claire

Lawhon, BS; Cynthia Moseid; Tina Oliver-Welker, CRTT; Denise Rodgers, RPFT; Sharon Sagel, MD; Deborah K. White, RPFT, RRT. Mary Caesar, MHS (Coordinator, 1993–1996); Diana S. Richardson (1994–1997); Elizabeth Ryan, PhD (1994–1996); Thomas F. Smith, MD (Co-Investigator, 1994–1998); Susan C. Sylvia, PhD (1994–1996); Carl Turner (1995–1997).

### **Resource centers**

**Bone Age Reading Center, Washington University, St Louis, MO:** William McAlister, MD (Director); Keith Kronemer, MD (Co-Investigator); Patty Suntrup.

Chair's Office, National Jewish Medical and Research Center, Denver, CO: Reuben Cherniack, MD (Study Chair).

**Coordinating Center, The Johns Hopkins University, Baltimore, MD:** James Tonascia, PhD (Director); Curtis Meinert, PhD (Co-Director). Debra Amend-Libercci; Marc Bacsafra; Patricia Belt; Karen Collins; Betty Collison; Christopher Dawson; Dawn Dawson; John Dodge; Michele Donithan, MHS; Vera Edmonds; Cathleen Ewing; Judith Harle; Robert Huffman; Rosetta Jackson; Kung-Yee Liang, PhD; Jill Meinert; Jennifer Meyers; Deborah Nowakowski; Bonnie Piantadosi, MSW, MPH; Michael Smith; Alice Sternberg, ScM; Mark Van Natta, MHS; Laura Wilson; Robert Wise, MD.

### **Dermatology, Allergy and Clinical Immunology (DACI) Reference Laboratory, Johns**

### **Hopkins University School of Medicine, Asthma and Allergy Center, Baltimore, MD:**

Robert G. Hamilton, PhD, D ABMLI (Director); Carol Schatz (Business Office Manager); Jack Wisenauer, MT (Laboratory Supervisor).

### **Drug Distribution Center, McKesson BioServices Corporation, Rockville, MD.**

Robert Rice, PhD, DVM (Director of Pharmaceutical Services Division Operations); Bob Hughes (Director of Pharmaceutical Repository); Tom Lynch (Repository Technician); Ken Farris; Jun Lee, RPh.

**Fundus Photography Reading Center, University of Wisconsin, Madison, WI:** Barbara Klein, MD, MPH (Director); Larry Hubbard; Michael Neider; Kurt Osterby; Nancy Robinson; Hugh Wabers.

**Immunology and Complement Laboratory, National Jewish Medical and Research Center, Denver, CO:** Ronald J. Harbeck, PhD, D ABMLI (Director); Rhonda Emerick, MT (ASCP) SM; Brian Watson, MLT (ASCP).

**Patient Education Center, National Jewish Medical and Research Center, Denver, CO:** Stanley Szeffler, MD (Director); Bruce Bender, PhD (Co-Director); Harold Nelson, MD. Cindi Culkin, MEd (Coordinator, 1996–1997); Jeryl Feeley, MA (Coordinator, 1992–1995); Sarah Oliver, MPH (Co-Coordinator, 1992–1996); Colleen Lum Lung, RN (1992–1994); Ann Mullen, RN (1994–1996); Christine Szeffler (1992–1994); Anne Walker, MPH (1998–1999).

**PDS Instrumentation:** Arlin Lehman, RCPT (President).

**Project Office, National Heart, Lung, and Blood Institute, Bethesda, MD:** Virginia Taggart, MPH (Project Officer); Pamela Randall (Contracting Officer); James Kiley, PhD; Margaret Wu, PhD. Paul Albert, PhD (1991–1999); Suzanne Hurd, PhD (1991–1999); Sydney Parker, PhD (1991–1994).

**Serum Repository, DACI Reference Laboratory, Johns Hopkins Asthma & Allergy Center, Baltimore, MD:** Robert Hamilton, PhD, D ABMLI (Director); N. Franklin Adkinson, MD (Co-Director).

**The University of Iowa, College of Pharmacy, Division of Pharmaceutical Services, Iowa City, IA:** Rolland Poust, PhD (Director); David Herold, RPh; Dennis Elbert, RPh.

#### **Pharmaceutical suppliers**

AstraZeneca, Westborough, MA.

Glaxo Inc Research Institute, Research Triangle Park, NC.

Rhone-Poulenc Rorer, Collegeville, PA.

Schering-Plough, Kenilworth, NJ.

### **Committees**

**Data and Safety Monitoring Board:** Howard Eigen, MD (Chair); Michelle Cloutier, MD; John Connett, PhD; Leona Cuttler, MD; Clarence E. Davis, PhD; David Evans, PhD; Meyer Kattan, MD; Sanford Leikin, MD; Rogelio Menendez, MD; F. Estelle R. Simons, MD.

**Executive Committee:** Reuben Cherniack, MD (Chair); Curtis Meinert, PhD; Robert Strunk, MD; Stanley Szeffler, MD; Virginia Taggart, MPH; James Tonascia, PhD.

**Steering Committee:** Reuben Cherniack, MD (Chair); Robert Strunk, MD (Vice-Chair); N. Franklin Adkinson, MD; Robert Annett, PhD (1992–1995, 1997–1999); Bruce Bender, PhD (1992–1994, 1997–1999); Mary Caesar, MHS (1994–1996); Thomas R. DuHamel, PhD (1992–1994, 1996–1999); H. William Kelly, PharmD; Henry Levison, MD (1992–1996); Alan Lincoln, PhD (1994–1995); Bennie McWilliams, MD (1992–1998); Curtis L. Meinert, PhD; Sydney Parker, PhD (1991–1994); Joe Reisman, MD, FRCP(C), MBA; Kay Seligsohn, PhD (1996–1997); Gail G. Shapiro, MD; Marian Sharpe (1993–1994); D Sundström (1998–1999); Stanley Szeffler, MD; Virginia Taggart, MPH; Martha Tata, RN (1996–1998); James Tonascia, PhD; Scott Weiss, MD, MS; Barbara Wheeler, RN, BSN (1993–1994); Robert Wise, MD; Robert Zeiger, MD, PhD.
